# Supplementary material
Source: publisher figshare collection journal article supplement (https://diabetesjournals.figshare.com/articles/dataset/_/17890715)
Supplement: Supplementary file 1 [file 1]

## Sheet: Sheet1
Supplemental Table 2b. Descriptive statistics for trials contributing one year data
			Look AHEAD							Diabetes Prevention Program							DIETFITS							Diabetes Prevention Study							PREDIMED-Plus
			Total		Intervention*		Control+			Total		Control+		Intervention*			Total		Healthy low fat*		Healthy low carbohydrate*			Total		Control+		Intervention*			Total		Control+		Intervention*
N			3444		1742		1702			1369		693		676			372		187		185			471		231		240			448		217		231
			Mean or N	SD or %	Mean or N	SD or %	Mean or N	SD or %		Mean or N	SD or %	Mean or N	SD or %	Mean or N	SD or %		Mean or N	SD or %	Mean or N	SD or %	Mean or N	SD or %		Mean or N	SD or %	Mean or N	SD or %	Mean or N	SD or %		Mean or N	SD or %	Mean or N	SD or %	Mean or N	SD or %
Age			58.995	6.7994	58.865	6.7923	59.13	6.8058		50.649	10.9152	50.66	10.4333	50.639	11.378		39.2742	6.8509	39.9634	6.65864	38.596	6.98196		55.3093	7.06247	54.9526	6.91625	55.6527	7.19811		65.183	4.8075	65.217	4.5931	65.152	5.0103
%Female			2331	0.676829	1133	0.650402	1198	0.703878		938	0.685172	480	0.692641	458	0.677515		276	0.741935	141	0.754011	135	0.72973		315	0.66879	157	0.679654	158	0.658333		252	0.5625	121	0.557604	131	0.5671
Race
	White		2839	0.824332	1432	0.822044	1407	0.826675		991	0.723886	499	0.720058	492	0.727811		360	0.967742	178	0.951872	182	0.983784		471	1	231	1	240	1		448	1	217	1	231	1
	African American		605	0.175668	310	0.177956	295	0.173325		378	0.276114	194	0.279942	184	0.272189		12	0.0322581	9	0.0481283	3	0.0162162
Body mass index (kg/m2)
	Baseline		36.097	5.9318	36.023	6.0493	36.174	5.8074		34.144	6.673	34.28	6.6543	34.01	6.6923		33.3482	3.31639	33.2558	3.40364	33.4392	3.23248		31.2941	4.5897	31.2088	4.57952	31.3761	4.60756		32.324	3.5891	32.542	3.6994	32.119	3.4778
	Change at year 1		-1.7783	2.70945	-3.1859	2.64616	-0.28	1.83012		-1.32619	2.44964	-0.19015	1.7568	-2.45702	2.51839		-2.1502	2.43765	-2.3183	2.39868	-1.9792	2.47166		-1.02829	1.73449	-0.33603	1.35868	-1.69159	1.79771		-0.63811	1.16386	-0.17361	1.04444	-1.07624	1.1009
Waist Circumference (cm)
	Baseline		114.496	13.9514	114.289	14.2675	114.712	13.6143		105.453	14.5746	105.512	14.3449	105.394	14.8061		106.894	10.9724	106.596	11.492	107.189	10.4488		101.455	11.011	100.886	11.0022	102.003	11.0146		105.973	9.9526	106.561	10.2436	105.422	9.6609
	Change at year 1		-4.3871	8.50493	-7.7795	8.48507	-0.7797	6.88963		-3.70638	7.03803	-0.89826	5.59049	-6.48871	7.22016		-4.3551	8.01666	-4.7688	7.68606	-3.932	8.34194		-2.94172	5.25693	-1.34912	4.90781	-4.47384	5.13401		-2.1436	3.9392	-0.78843	3.44949	-3.42183	3.95177
Waist to hip ratio
	Baseline									0.925	0.0847	0.923	0.0832	0.927	0.0862									0.922227	0.0733827	0.919996	0.0746185	0.924373	0.072265		0.966	0.0765	0.968	0.073	0.964	0.0798
	Change at year 1									-0.01339	0.05441	-0.00435	0.04825	-0.02235	0.05856									-0.00735	0.0393	-0.00345	0.03722	-0.0111	0.04093		-0.00668	0.02789	-0.00073	0.02448	-0.01231	0.02976
Multi-ancestry Polygenic Risk Score
	White
		PS: Full sample	44.11	5.05	44	5.05	44.22	5.04		44.983	5.4042	45.049	5.4944	44.916	5.316		47.5103	4.98687	47.927	5.10318	47.1026	4.84981		46.9068	4.85213	46.7153	4.8942	47.0912	4.81431		47.735	4.8968	47.997	5.0865	47.489	4.7087
		PS: Female	45.76	5.07	45.64	5.12	45.88	5.02		48.358	5.2651	48.478	5.5874	48.23	4.905		51.5797	5.04649	52.3265	4.96144	50.7958	5.0402		48.2393	4.90079	48.164	4.82945	48.3141	4.98489		50.133	5.1664	50.45	5.3766	49.838	4.9654
		PS: Male	39.97	7.86	40.02	8.03	39.92	7.7		35.844	7.5587	36.185	7.2746	35.528	7.82		36.5468	7.86488	36.7297	8.15337	36.3843	7.64666		44.0318	7.7924	42.9588	7.56087	45.0001	7.91668		41.571	7.7374	42.611	8.0855	40.574	7.2893
	African American
		PS: Full sample	45.83	5.03	45.36	5.06	46.32	4.96		48.227	5.1297	47.969	5.1386	48.5	5.1202		52.4652	5.50752
		PS: Female	46.03	4.98	45.72	4.99	46.36	4.95		49.171	5.1502	48.828	5.2022	49.52	5.092		56.0833	5.76087
		PS: Male	45.32	7.88	44.76	7.98	45.96	7.98		45.993	8.0411	46.121	7.9419	45.843	8.2415		42.4566	6.44329
*Intervention is defined as behavioral weight loss treatment. Included in the intervention category are: Look AHEAD, Intensive Lifestyle Intervention; DPP, Lifestyle Intervention; DPS, Lifestyle Intervention; PrediMed-Plus, Low Calorie Mediterranean Diet; DIETFITS, Healthy Low Fat Diet and Healthy Low Carbohydrate Diet
'+Control is defined as no behavioral weight loss treatment. Included in this category are: Look AHEAD, Diabetes Support and Education, DPP, Placebo; Finnish DPP, Usual Care; PrediMed-Plus, Control.
