# Supplementary material
Source: publisher figshare collection journal article supplement (https://diabetesjournals.figshare.com/articles/dataset/_/17890715)
Supplement: Supplementary file 1 [file 1]

## Supplemental Document 1. Research groups and funding

**Funding:** The analyses supporting this paper were supported by NCI/Westat Contract# 6632.01 S06.

### Look AHEAD

#### Look AHEAD Research Group at End of Continuation

##### Clinical Sites

The Johns Hopkins University Frederick L. Brancati, MD, MHS<sup>1\*</sup>; Jeanne M. Clark, MD, MPH<sup>1</sup> (Co-Principal Investigators); Lee Swartz<sup>2</sup>; Jeanne Charleston, RN<sup>3</sup>; Lawrence Cheskin, MD<sup>3</sup>; Richard Rubin, PhD<sup>3\*</sup>; Jean Arceci, RN; David Bolen; Danielle Diggins; Mia Johnson; Joyce Lambert; Sarah Longenecker; Kathy Michalski, RD; Dawn Jiggetts; Chanchai Sapun; Maria Sowers; Kathy Tyler

\*deceased

Pennington Biomedical Research Center George A. Bray, MD<sup>1</sup>; Allison Strate, RN<sup>2</sup>; Frank L. Greenway, MD<sup>3</sup>; Donna H. Ryan, MD<sup>3</sup>; Donald Williamson, PhD<sup>3</sup>; Timothy Church, MD<sup>3</sup>; Catherine Champagne, PhD, RD; Valerie Myers, PhD; Jennifer Arceneaux, RN; Kristi Rau; Michelle Begnaud, LDN, RD, CDE; Barbara Cerniauskas, LDN, RD, CDE; Crystal Duncan, LPN; Helen Guay, LDN, LPC, RD; Carolyn Johnson, LPN, Lisa Jones; Kim Landry; Missy Lingle; Jennifer Perault; Cindy Puckett; Marisa Smith; Lauren Cox; Monica Lockett, LPN

The University of Alabama at Birmingham Cora E. Lewis, MD, MSPH<sup>1</sup>; Sheikilya Thomas, PhD, MPH<sup>2</sup>; Monika Safford, MD<sup>3</sup>; Stephen Glasser, MD<sup>3</sup>; Vicki DiLillo, PhD<sup>3</sup>; Gareth Dutton, PhD, Charlotte Bragg, MS, RD, LD; Amy Dobelstein; Sara Hannum; Anne Hubbell, MS; Jane King, MLT; DeLavallade Lee; Andre Morgan; L. Christie Oden; Janet Wallace, MS; Cathy Roche, PhD, RN, BSN; Jackie Roche; Janet Turman

##### Harvard Center

*Massachusetts General Hospital.* David M. Nathan, MD<sup>1</sup>; Enrico Cagliero, MD<sup>3</sup>; Heather Turgeon, RN, BS, CDE<sup>2</sup>; Barbara Steiner, EdM; Valerie Goldman, MS, RDN<sup>2</sup>; Linda Delahanty, MS, RDN<sup>3</sup>; Ellen Anderson, MS, RDN<sup>3</sup>; Laurie Bissett, MS, RDN; Christine Stevens, RN; Mary Larkin, RN; Kristen Dalton, BS, Roshni Singh, BS

*Joslin Diabetes Center.* Edward S. Horton, MD<sup>1</sup>; Sharon D. Jackson, MS, RD, CDE<sup>2</sup>; Osama Hamdy, MD, PhD<sup>3</sup>; A. Enrique Caballero, MD<sup>3</sup>; Sarah Bain, BS; Elizabeth McKinney, BSN, RN; Barbara Fargnoli, MS, RD; Jeanne Spellman, BS, RD; Kari Galuski, RN; Ann Goebel-Fabbri, PhD; Lori Lambert, MS, RD; Sarah Ledbury, MEd, RD; Maureen Malloy, BS; Kerry Ovalle, MS, RCEP, CDE

*Beth Israel Deaconess Medical Center.* George Blackburn, MD, PhD<sup>1</sup>; Christos Mantzoros, MD, DSc<sup>3</sup>; Ann McNamara, RN

University of Colorado Anschutz Medical Campus James O. Hill, PhD<sup>1</sup>; Marsha Miller, MS RD<sup>2</sup>; Holly Wyatt, MD<sup>3</sup>; Brent Van Dorsten, PhD<sup>3</sup>; Judith Regensteiner, PhD<sup>3</sup>; Debbie Bochert; Gina Claxton-Malloy RD Ligia Coelho, BS; Paulette Cohrs, RN, BSN; Susan Green; April Hamilton, BS, CCRC; Jere Hamilton, BA; Eugene Leshchinskiy; Loretta Rome, TRS; Terra Thompson, BA, Kirstie Craul, RD, CDE; Cecilia Wang, MD

Baylor College of Medicine John P. Foreyt, PhD<sup>1</sup>; Rebecca S. Reeves, DrPH, RD<sup>2</sup>; Molly Gee, MEd, RD<sup>2</sup>; Henry Pownall, PhD<sup>3</sup>; Ashok Balasubramanyam, MBBS<sup>3</sup>; Chu-Huang Chen, MD, PhD<sup>3</sup>; Peter Jones, MD<sup>3</sup>; Michele Burrington, RD, RN; Allyson Clark Gardner, MS, RD; Sharon Griggs; Michelle Hamilton; Veronica Holley; Sarah Lee; Sarah Lane Liscum, RN, MPH; Susan Cantu-Lumbreras; Julieta Palencia, RN; Jennifer Schmidt; Jayne Thomas, RD; Carolyn White; Charlyne Wright, RN; Monica Alvarez, PCT

The University of Tennessee Health Science Center

*University of Tennessee East.* Karen C. Johnson, MD, MPH<sup>1</sup>; Karen L. Wilson, BSN<sup>2</sup>; Mace Coday, PhD<sup>3</sup>; Beate Griffin, RN, BS; Donna Valenski; Polly Edwards; Brenda Fonda; Kim Ward

*University of Tennessee Downtown.* Helmut Steinburg, MD<sup>3</sup>; Carolyn Gresham, BSN<sup>2</sup>; Moana Mosby, RN; Debra Clark, LPN; Donna Green RN; Abbas E. Kitabchi, PhD, MD (retired)

University of Minnesota Robert W. Jeffery, PhD<sup>1</sup>; Tricia Skarphol, MA<sup>2</sup>; John P. Bantle, MD<sup>3</sup>; J. Bruce Redmon, MD<sup>3</sup>; Richard S. Crow, MD<sup>3</sup>; Scott J. Crow, MD<sup>3</sup>; Manami Bhattacharya, BS; Cindy Bjerk, MS, RD; Kerrin Brelje, MPH, RD; Carolyne Campbell; Mary Ann Forseth, BA; Melanie Jaeb, MPH, RD; Philip Lacher, BBA; Patti Laqua, BS, RD; Birgitta I. Rice, MS, RPh, CHES; Ann D. Tucker, BA; Mary Susan Voeller, BA

St. Luke's Roosevelt Hospital Center Xavier Pi-Sunyer, MD<sup>1</sup>; Jennifer Patricio, MS<sup>2</sup>; Carmen Pal, MD<sup>3</sup>; Lynn Allen, MD; Janet Crane, MA, RD, CDN; Lolline Chong, BS, RD; Diane Hirsch, RNC, MS, CDE; Mary Anne Holowaty, MS, CN; Michelle Horowitz, MS, RD; Raashi Mamtani, MS

University of Pennsylvania Thomas A. Wadden, PhD<sup>1</sup>; Barbara J. Maschak-Carey, MSN, CDE<sup>2</sup>; Robert I. Berkowitz, MD<sup>3</sup>; Gary Foster, PhD<sup>3</sup>; Henry Glick, PhD<sup>3</sup>; Shiriki Kumanyika, PhD RD, MPH<sup>3</sup>; Yuliis Bell, BA; Raymond Carvajal, PsyD; Helen Chomentowski; Renee Davenport; Lucy Faulconbridge, PhD; Louise Hesson, MSN, CRNP; Sharon Leonard, RD; Monica Mullen, RD, MPH

University of Pittsburgh John M. Jakicic, PhD<sup>1</sup>; David E. Kelley, MD<sup>1</sup>; Jacqueline Wesche-Thobaben, RN, BSN, CDE<sup>2</sup>; Daniel Edmundowicz, MD<sup>3</sup>; Lin Ewing, PhD, RN<sup>3</sup>; Andrea Hergenroeder, PhD, PT, CCS<sup>3</sup>; Mary L. Klem, PhD, MLIS<sup>3</sup>; Mary Korytkowski, MD<sup>3</sup>; Andrea Kriska, PhD<sup>3</sup>; Lewis H. Kuller, MD, DrPH<sup>3</sup>; Amy D. Rickman, PhD, RD, LDN<sup>3</sup>; Rose Salata, MD<sup>3</sup>; Monica E. Yamamoto, DrPH, RD, FADA<sup>3</sup>; Janet Bonk, RN, MPH; Susan Copelli, BS, CTR; Rebecca Danchenko, BS; Tammy DeBruce, BA; Barbara Elnyczky; David O. Garcia, PhD; George A. Grove, MS; Patricia H. Harper, MS, RD, LDN; Susan Harrier, BS; Diane Heidingsfelder, MS, RD, CDE, LDN; Nicole L. Helbling, MS, RN; Diane Ives, MPH; Janet Krulia, RN, BSN, CDE; Juliet Mancino, MS, RD, CDE, LDN; Anne Mathews, PhD, RD, LDN; Lisa Martich, BS, RD, LDN; Meghan McGuire, MS; Tracey Y. Murray, BS; Anna Peluso, MS; Karen Quirin; Jennifer Rush, MPH; Joan R. Ritchea; Linda Semler, MS, RD, LDN; Karen Vujevich, RN-BC, MSN, CRNP; Kathy Williams, RN, MHA; Donna L. Wolf, PhD

The Miriam Hospital/Brown Medical School Rena R. Wing, PhD<sup>1</sup>; Renee Bright, MS<sup>2</sup>; Vincent Pera, MD<sup>3</sup>; Deborah Tate, PhD<sup>3</sup>; Amy Gorin, PhD<sup>3</sup>; Kara Gallagher, PhD<sup>3</sup>; Amy Bach, PhD; Barbara Bancroft, RN, MS; Anna Bertorelli, MBA, RD; Richard Carey, BS; Tatum Charron, BS; Heather Chenot, MS; Kimberley Chula-Maguire, MS; Pamela Coward, MS, RD; Lisa Cronkite, BS; Julie Currin, MD; Maureen Daly, RN; Caitlin Egan, MS; Erica Ferguson, BS, RD; Linda Foss, MPH; Jennifer Gauvin, BS; Don Kieffer, PhD; Lauren Lessard, BS; Deborah Maier, MS; JP Massaro, BS; Tammy Monk, MS; Rob Nicholson, PhD; Erin Patterson, BS; Suzanne Phelan, PhD; Hollie Raynor, PhD, RD; Douglas Raynor, PhD; Natalie Robinson, MS, RD; Deborah Robles; Jane Tavares, BS

The University of Texas Health Science Center at San Antonio Helen P. Hazuda, PhD<sup>1</sup>; Maria G. Montez, RN, MSHP, CDE<sup>2</sup>; Carlos Lorenzo, MD<sup>3</sup>; Charles F. Coleman, MS, RD; Domingo Granado, RN; Kathy Hathaway, MS, RD; Juan Carlos Isaac, RC, BSN; Nora Ramirez, RN, BSN

VA Puget Sound Health Care System / University of Washington Steven E. Kahn, MB, ChB<sup>1</sup>; Anne Kure, BS<sup>2</sup>; Edward J. Boyko, MD, MPH<sup>3</sup>; Edward Lipkin, MD, PhD<sup>3</sup>; Dace Trence, MD<sup>3</sup>; Subbulaxmi Trikudanathan, MD, MRCP, MMSc<sup>3</sup>; Elaine Tsai, MD<sup>3</sup>; Brenda Montgomery, RN, MS, CDE; Ivy Morgan-Taggart; Jolanta Socha, BS; Lonnese Taylor, RN, BS; Alan Wesley, BA

Southwestern American Indian Center, Phoenix, Arizona and Shiprock, New Mexico William C. Knowler, MD, DrPH<sup>1</sup>; Paula Bolin, RN, MC<sup>2</sup>; Tina Killeen, BS<sup>2</sup>; Maria Cassidy-Begay, BSND, RND<sup>2</sup>; Katie Toledo, MS, LPC<sup>2</sup>; Cathy Manus, LPN<sup>3</sup>; Jonathan Krakoff, MD<sup>3</sup>; Jeffrey M. Curtis, MD, MPH<sup>3</sup>; Sara Michaels, MD<sup>3</sup>; Paul Bloomquist, MD<sup>3</sup>; Peter H. Bennett, MB, FRCP<sup>3</sup>; Bernadita Fallis, RN, RHIT, CCS; Diane F. Hollowbreast; Ruby Johnson; Maria Meacham, BSN, RN, CDE; Christina Morris, BA; Julie Nelson, RD; Carol Percy, RN, MS; Patricia Poorthunder; Sandra Sangster; Leigh A. Shovestull, RD, CDE; Miranda Smart; Janelia Smiley; Teddy Thomas, BS

University of Southern California Anne Peters, MD<sup>1</sup>; Siran Ghazarian, MD<sup>2</sup>; Elizabeth Beale, MD<sup>3</sup>; Kati Konersman, RD, CDE; Brenda Quintero-Varela; Edgar Ramirez; Gabriela Rios, RD; Gabriela Rodriguez, MA; Valerie Ruelas MSW, LCSW; Sara Serafin-Dokhan; Martha Walker, RD

### **Coordinating Center**

Wake Forest University Mark A. Espeland, PhD<sup>1</sup>; Judy L. Bahnson, BA, CCRP<sup>3</sup>; Lynne E. Wagenknecht, DrPH<sup>1</sup>; David Reboussin, PhD<sup>3</sup>; W. Jack Rejeski, PhD<sup>3</sup>; Alain G. Bertoni, MD, MPH<sup>3</sup>; Wei Lang, PhD<sup>3</sup>; David Lefkowitz, MD<sup>3</sup>; Patrick S. Reynolds, MD<sup>3</sup>; Denise Houston, PhD<sup>3</sup>; Mike E. Miller, PhD<sup>3</sup>; Laura D. Baker, PhD<sup>3</sup>; Nicholas Pajewski, PhD<sup>3</sup>; Stephen R. Rapp, PhD<sup>3</sup>; Stephen Kritchevsky, PhD<sup>3</sup>; Haiying Chen, PhD, MM<sup>3</sup>; Valerie Wilson, MD<sup>3</sup>; Delia S. West, PhD<sup>3</sup>; Ron Prineas, MD<sup>3</sup>; Tandaw Samdarshi, MD<sup>3</sup>; Amelia Hodges, BS, CCRP<sup>2</sup>; Karen Wall<sup>2</sup>; Carrie C. Williams, MA, CCRP<sup>2</sup>; Andrea Anderson, MS; Jerry M. Barnes, MA; Tara D. Beckner; Delilah R. Cook; Valery S. Effoe, MD, MS; Melanie Franks, BBA; Katie Garcia, MS; Sarah A. Gaussoin, MS; Candace Goode; Michelle Gordon, MS; Lea Harvin, BS; Mary A. Hontz, BA; Don G. Hire, BS; Patricia Hogan, MS; Mark King, BS; Kathy Lane, BS; Rebecca H. Neiberg, MS; Julia T. Rushing, MS; Debbie Steinberg, BS; Jennifer Walker, MS; Michael P. Walkup, MS;

### **Central Resources Centers**

Central Laboratory, Northwest Lipid Metabolism and Diabetes Research Laboratories Santica M. Marcovina, PhD, ScD<sup>1</sup>; Jessica Hurting<sup>2</sup>; John J. Albers, PhD<sup>3</sup>, Vinod Gaur, PhD<sup>4</sup>

ECG Reading Center, EPICARE, Wake Forest University School of Medicine Elsayed Z. Soliman MD, MSc, MS<sup>1</sup>; Charles Campbell <sup>2</sup>; Zhu-Ming Zhang, MD<sup>3</sup>; Mary Barr; Susan Hensley; Julie Hu; Lisa Keasler; Yabing Li, MD

Hall-Foushee Communications, Inc.  
Richard Foushee, PhD; Nancy J. Hall, MA

### **Federal Sponsors**

National Institute of Diabetes and Digestive and Kidney Diseases Mary Evans, PhD; Van S. Hubbard, MD, PhD; Susan Z. Yanovski, MD

National Heart, Lung, and Blood Institute Lawton S. Cooper, MD, MPH; Peter Kaufman, PhD, FABMR; Mario Stylianou, PhD

Centers for Disease Control and Prevention Edward W. Gregg, PhD; Ping Zhang, PhD

### **Funding and Support**

Funded by the National Institutes of Health through cooperative agreements with the National Institute of Diabetes and Digestive and Kidney Diseases: DK57136,

DK57149, DK56990, DK57177, DK57171, DK57151, DK57182, DK57131, DK57002, DK57078, DK57154, DK57178, DK57219, DK57008, DK57135, and DK56992. Additional funding was provided by the National Heart, Lung, and Blood Institute; National Institute of Nursing Research; National Center on Minority Health and Health Disparities; NIH Office of Research on Women's Health; and the Centers for Disease Control and Prevention. This research was supported in part by the Intramural Research Program of the National Institute of Diabetes and Digestive and Kidney Diseases. The Indian Health Service (I.H.S.) provided personnel, medical oversight, and use of facilities. The opinions expressed in this paper are those of the authors and do not necessarily reflect the views of the I.H.S. or other funding sources.

Additional support was received from The Johns Hopkins Medical Institutions Bayview General Clinical Research Center (M01RR02719); the Massachusetts General Hospital Mallinckrodt General Clinical Research Center and the Massachusetts Institute of Technology General Clinical Research Center (M01RR01066); the Harvard Clinical and Translational Science Center (RR025758-04); the University of Colorado Health Sciences Center General Clinical Research Center (M01RR00051) and Clinical Nutrition Research Unit (P30 DK48520); the University of Tennessee at Memphis General Clinical Research Center (M01RR0021140); the University of Pittsburgh General Clinical Research Center (GCRC) (M01RR000056), the Clinical Translational Research Center (CTRC) funded by the Clinical & Translational Science Award (UL1 RR 024153) and NIH grant (DK 046204); the VA Puget Sound Health Care System Medical Research Service, Department of Veterans Affairs; and the Frederic C. Bartter General Clinical Research Center (M01RR01346).

The following organizations have committed to make major contributions to Look AHEAD: FedEx Corporation; Health Management Resources; LifeScan, Inc., a Johnson & Johnson Company; OPTIFAST® of Nestle HealthCare Nutrition, Inc.; Hoffmann-La Roche Inc.; Abbott Nutrition; and Slim-Fast Brand of Unilever North America.

Some of the information contained herein was derived from data provided by the Bureau of Vital Statistics, New York City Department of Health and Mental Hygiene.

---

<sup>1</sup> Principal Investigator

<sup>2</sup> Program Coordinator

<sup>3</sup> Co-Investigator

All other Look AHEAD staffs are listed alphabetically by site.

Look AHEAD Genotyping: The Look AHEAD CardiometaboChip genotyping was funded by X01 HG006659. The genome-wide genotyping in Look AHEAD was funded by Innovative Medicines Initiative Joint Undertaking No. 115317 (DIRECT).

## **Diabetes Prevention Program**

**DPP, DPPOS 1, DPPOS 2 & DPPOS 3A Research Group**  
(1996-2021)

### **Pennington Biomedical Research Center**

#### **(Baton Rouge, LA)**

George A. Bray, MD\*  
Kishore M. Gadde, MD\*  
Iris W. Culbert, BSN, RN, CCRC\*\*  
Jennifer Arceneaux RN, BSN\*\*  
Annie Chatellier, RN, CCRC\*\*  
Amber Dragg RD, LDN\*\*  
Catherine M. Champagne, PhD, RD  
Crystal Duncan, LPN  
Barbara Eberhardt, RD, LDN  
Frank Greenway, MD  
Fonda G. Guillory, LPN  
April A. Herbert, RD  
Michael L. Jeffirs, LPN  
Betty M. Kennedy, MPA  
Erma Levy, RD  
Monica Lockett, LPN  
Jennifer C. Lovejoy, PhD  
Laura H. Morris, BS  
Lee E. Melancon, BA, BS  
Donna H. Ryan, MD  
Deborah A. Sanford, LPN  
Kenneth G. Smith, BS, MT  
Lisa L. Smith, BS  
Julia A. St.Amant, RTR  
Richard T. Tulley, PhD  
Paula C. Vicknair, MS, RD  
Donald Williamson, PhD  
Jeffery J. Zachwieja, PhD

#### **University of Chicago (Chicago, IL)**

Kenneth S. Polonsky, MD\*  
Janet Tobian, MD, PhD\*  
David A. Ehrmann, MD\*  
Margaret J. Matulik, RN, BSN\*\*  
Karla A. Temple, PhD, RDN, LDN\*\*  
Bart Clark, MD  
Kirsten Czech, MS  
Catherine DeSandre, BA  
Brittnie Dotson, MS  
Ruthanne Hilbrich, RD  
Wylie McNabb, EdD  
Ann R. Semenske, MS, RD

#### **Jefferson Medical College (Philadelphia, PA)**

Jose F. Caro, MD\*  
Kevin Furlong, DO\*  
Barry J. Goldstein, MD, PhD\*

Pamela G. Watson, RN, ScD\*

Kellie A. Smith, RN, MSN\*\*

Jewel Mendoza, RN, BSN\*\*

Marsha Simmons, CCRP\*\*

Wendi Wildman, RN\*\*

Renee Liberoni, MPH

John Spandorfer, MD

Constance Pepe, MS, RD

**University of Miami (Miami, FL)**

Richard P. Donahue, PhD\*

Ronald B. Goldberg, MD\*

Ronald Prineas, MD, PhD\*

Jeanette Calles, MEd\*\*

Anna Giannella, RD, MS\*\*

Patricia Rowe, MPA\*\*

Juliet Sanguily, RN\*\*

Paul Cassanova-Romero, MD

Sumaya Castillo-Florez, MPH

Hermes J. Florez, MD

Rajesh Garg, MD

Lascelles Kirby, MS

Olga Lara

Carmen Larreal

Valerie McLymont, RN

Jadell Mendez

Arlette Perry, PhD

Patrice Saab, PhD

Bertha Veciana

**The University of Texas Health Science Center  
(San Antonio, TX)**

Steven M. Haffner, MD, MPH\*

Helen P. Hazuda, PhD\*

Maria G. Montez, RN, MSHP, CDE\*\*

Kathy Hattaway, RD, MS

Juan Isaac, RN, BSN

Carlos Lorenzo, MD, PhD

Arlene Martinez, RN, BSN, CDE

Monica Salazar

Tatiana Walker, RD, MS, CDE

**University of Colorado (Denver, CO)**

Dana Dabelea, MD, PhD\*

Richard F. Hamman, MD, DrPH\*

Patricia V. Nash, MS\*\*

Sheila C. Steinke, MS\*\*

Lisa Testaverde, MS\*\*

Jennifer Truong, MPH\*\*

Denise R. Anderson, RN, BSN

Larry B. Ballonoff, MD

Alexis Bouffard, MA, RN, BSN

Brian Bucca OD, FAOD

B. Ned Calonge, MD, MPH

Lynne Delve

Martha Farago, RN  
James O. Hill, PhD  
Shelley R. Hoyer, BS  
Tonya Jenkins, RD, CDE  
Bonnie T. Jortberg, MS, RD, CDE  
Dione Lenz, RN, BSN, CDE  
Marsha Miller, MS, RD  
Thomas Nilan, BS  
Leigh Perreault, MD  
David W. Price, MD  
Judith G. Regensteiner, PhD  
Emily B. Schroeder, MD  
Helen Seagle, MS, RD  
Carissa M. Smith, BS  
Brent VanDorsten, PhD

**Joslin Diabetes Center (Boston, MA)**

Edward S. Horton, MD\*  
Medha Munshi, MD\*  
Kathleen E. Lawton, RN\*\*  
Sharon D. Jackson, CCRC, MS, RD, CDE\*\*  
Catherine S. Poirier, RN, BSN\*\*  
Kati Swift, RN, BSN\*\*  
Ronald A. Arky, MD  
Marybeth Bryant  
Jacqueline P. Burke, BSN  
Enrique Caballero, MD  
Karen M. Callaphan, BA  
Barbara Fagnoli, RD  
Therese Franklin  
Om P. Ganda, MD  
Ashley Guidi, BS  
Mathew Guido, BA  
Alan M. Jacobsen, MD  
Lyn M. Kula, RD  
Margaret Kocal, RN, CDE  
Lori Lambert, MS, RD, LD  
Kathleen E. Lawton, RN  
Sarah Ledbury, Med, RD  
Maureen A. Malloy, BS  
Roeland J.W. Middelbeek, MD  
Maryanne Nicosia, MS, RD  
Cathryn F. Oldmixon, RN  
Jocelyn Pan, BS, MPH  
Marizel Quitingon  
Riley Rainville, BS  
Stacy Rubtchinsky, BS  
Ellen W. Seely, MD  
Jessica Sansoucy, BS  
Dana Schweizer, BSN  
Donald Simonson, MD  
Fannie Smith, MD  
Caren G. Solomon, MD, MPH



Jeanne Spellman, RD

James Warram, MD

**VA Puget Sound Health Care System and University of Washington (Seattle, WA)**

Steven E. Kahn, MB, ChB\*

Basma Fattaleh, BA \*\*

Brenda K. Montgomery, RN, BSN, CDE\*\*

Celeste Colegrove, BS

Wilfred Fujimoto, MD

Robert H. Knopp, MD

Edward W. Lipkin, MD

Michelle Marr, BA

Ivy Morgan-Taggart

Anne Murillo, BS

Kayla O'Neal, BS

Dace Trence, MD

Lonnese Taylor, RN, BS

April Thomas, RD, MPH, CDE

Elaine C. Tsai, MD, MPH

**University of Tennessee (Memphis, TN)**

Samuel Dagogo-Jack, MD, MSc, FRCP, FACP\*

Abbas E. Kitabchi, PhD, MD, FACP\*

Mary E. Murphy, RN, MS, CDE, MBA\*\*

Laura Taylor, RN, BSN, CDE\*\*

Jennifer Dolgoff, RN, BSN\*\*

William B. Applegate, MD, MPH

Michael Bryer-Ash, MD

Debra Clark, LPN

Sandra L. Frieson, RN

Uzoma Ibebuogu, MD

Raed Imseis, MD

Helen Lambeth, RN, BSN

Lynne C. Lichtermann, RN, BSN

Hooman Oktaei, MD

Harriet Ricks

Lily M.K. Rutledge, RN, BSN

Amy R. Sherman, RD, LD

Clara M. Smith, RD, MHP, LDN

Judith E. Soberman, MD

Beverly Williams-Cleaves, MD

Avnisha Patel, MLT

Ebenezer A. Nyenwe, MD, FACP

Ethel Faye Hampton, R.N.

**Northwestern University's Feinberg School of Medicine (Chicago, IL)**

Boyd E. Metzger, MD\*

Mark E. Molitch, MD\*

Mariana K. Johnson, MS, RN\*\*

Daphne T. Adelman, MBA, RN

Catherine Behrends

Michelle Cook, MS

Marian Fitzgibbon, PhD

Mimi M. Giles, MS, RD

Deloris Heard, MA

Cheryl K.H. Johnson, MS, RN  
Diane Larsen, BS  
Anne Lowe, BS  
Megan Lyman, BS  
David McPherson, MD  
Samsam C. Penn, BA  
Thomas Pitts, MD  
Renee Reinhart, RN, MS  
Susan Roston, RN, RD  
Pamela A. Schinleber, RN, MS  
Amisha Wallia, MD

**Massachusetts General Hospital (Boston, MA)**

David M. Nathan, MD\*  
Charles McKittrick, BSN\*\*  
Heather Turgeon, BSN\*\*  
Mary Larkin, MSN\*\*  
Marielle Mugford, BA\*\*  
Kathy Abbott  
Ellen Anderson, MS, RD  
Laurie Bissett, MS, RD  
Kristy Bondi, BS  
Enrico Cagliero, MD  
Jose C. Florez, MD, PhD+  
Linda Delahanty, MS, RD  
Valerie Goldman, MS, RD  
Elaine Grassa  
Lindsery Gurry BSN, RN, CDE  
Kali D'Anna  
Fernelle Leandre BS  
Peter Lou, MD  
Alexandra Poulos  
Elyse Raymond, BS  
Valerie Ripley, BS  
Christine Stevens, RN  
Beverly Tseng

**University of California-San Diego (La Jolla, CA)**

Jerrold M. Olefsky, MD\*  
Elizabeth Barrett-Connor, MD\*  
Sunder Mudaliar, MD\*  
Maria Rosario Araneta, PhD\*  
Mary Lou Carrion-Petersen, RN, BSN\*\*  
Karen Vejvoda, RN, BSN, CDE, CCRC\*\*  
Sarah Bassiouni, MPH  
Madeline Beltran, RN, BSN, CDE  
Lauren N. Claravall, BS  
Jonalle M. Dowden, BS  
Steven V. Edelman, MD  
Pranav Garimella, MBBS  
Robert R. Henry, MD  
Javiva Horne, RD  
Marycie Lamkin, RN  
Simona Szerdi Janesch, BA

Diana Leos  
William Polonsky, PhD  
Rosa Ruiz  
Jean Smith, RN  
Jennifer Torio-Hurley

**Columbia University (New York, NY)**

F. Xavier Pi-Sunyer, MD\*  
Jane E. Lee, MS\*\*  
Susan Hagamen, MS, RN, CDE\*\*  
David B. Allison, PhD  
Nnenna Agharanya  
Nancy J. Aronoff, MS, RD  
Maria Baldo  
Jill P. Crandall, MD  
Sandra T. Foo, MD  
Jose A. Luchsinger, MD, MPH  
Carmen Pal, MD  
Kathy Parkes, RN  
Mary Beth Pena, RN  
Ellen S. Rooney, BA  
Gretchen E.H. Van Wye, MA  
Kristine A. Viscovich, ANP

**Indiana University (Indianapolis, IN)**

Mary de Groot, PhD\*  
David G. Marrero, PhD\*  
Kieren J. Mather, MD\*  
Melvin J. Prince, MD\*  
Susie M. Kelly, RN, CDE\*\*  
Marcia A. Jackson\*\*  
Gina McAtee\*\*  
Paula Putteney, RN\*\*  
Ronald T. Ackermann, MD  
Carolyn M. Cantrell  
Yolanda F. Dotson, BS  
Edwin S. Fineberg, MD  
Megan Fultz  
John C. Guare, PhD  
Angela Hadden  
James M. Ignaut, MA  
Marion S. Kirkman, MD  
Erin O'Kelly Phillips  
Kisha L Pinner  
Beverly D. Porter, MSN  
Paris J. Roach, MD  
Nancy D. Rowland, BS, MS  
Madelyn L. Wheeler, RD

**Medstar Research Institute (Washington, DC)**

Vanita Aroda, MD\*  
Michelle Magee, MD\*  
Robert E. Ratner, MD\*  
Gretchen Youssef, RD, CDE\*\*  
Sue Shapiro, RN, BSN, CCRC\*\*

Natalie Andon, RN  
Catherine Bavido-Arrage, MS, RD, LD  
Geraldine Boggs, MSN, RN  
Marjorie Bronsord, MS, RD, CDE  
Ernestine Brown  
Holly Love Burkott, RN  
Wayman W. Cheatham, MD  
Susan Cola  
Cindy Evans  
Peggy Gibbs  
Tracy Kellum, MS, RD, CDE  
Lilia Leon  
Milvia Lagarda  
Claresa Levatan, MD  
Milajurine Lindsay  
Asha K. Nair, BS  
Jean Park, MD  
Maureen Passaro, MD  
Angela Silverman  
Gabriel Uwaifo, MD  
Debra Wells-Thayer, NP, CDE  
Renee Wiggins, RD

**University of Southern California/UCLA Research Center (Alhambra, CA)**

Mohammed F. Saad, MD\*  
Karol Watson, MD\*  
Maria Budget\*\*  
Sujata Jinagouda, MD\*\*  
Medhat Botrous, MD\*\*  
Anthony Sosa\*\*  
Sameh Tadros\*\*  
Khan Akbar, MD  
Claudia Conzues  
Perpetua Magpuri  
Kathy Ngo  
Amer Rassam, MD  
Debra Waters  
Kathy Xaphthalamous

**Washington University (St. Louis, MO)**

Julio V. Santiago, MD\*  
Samuel Dagogo-Jack, MD, MSc, FRCP, FACP\*  
Neil H. White, MD, CDE\*  
Angela L. Brown, MD\*  
Samia Das, MS, MBA, RD, LD\*\*  
Prajakta Khare-Ranade, MSc, RDN, LD\*\*  
Tamara Stich, RN, MSN, CDE\*\*  
Ana Santiago, RN  
Edwin Fisher, PhD  
Emma Hurt, RN  
Tracy Jones, RN  
Michelle Kerr, RD  
Lucy Ryder, RN  
Cormarie Wernimont, RD, LD

**Johns Hopkins School of Medicine**  
**(Baltimore, MD)**

Sherita Hill Golden, MD, MHS, FAHA\*  
Christopher D. Saudek, MD\*  
Vanessa Bradley, BA\*\*  
Emily Sullivan, MEd, RN\*\*  
Tracy Whittington, BS\*\*  
Caroline Abbas  
Adrienne Allen  
Frederick L. Brancati, MD, MHS  
Sharon Cappelli  
Jeanne M. Clark, MD  
Jeanne B. Charleston, RN, MSN  
Janice Freel  
Katherine Horak, RD  
Alicia Greene  
Dawn Jiggetts  
Deloris Johnson  
Hope Joseph  
Kimberly Loman  
Nestoras Mathioudakis, MD, MHS  
Henry Mosley  
John Reusing  
Richard R. Rubin, PhD  
Alafia Samuels, MD  
Thomas Shields  
Shawne Stephens  
Kerry J. Stewart, EdD  
LeeLana Thomas  
Evonne Utsey  
Paula Williamson

**University of New Mexico (Albuquerque, NM)**

David S. Schade, MD\*  
Karwyn S. Adams, RN, MSN\*\*  
Janene L. Canady, RN, CDE\*\*  
Carolyn Johannes, RN, CDE\*\*  
Claire Hemphill, RN, BSN\*\*  
Penny Hyde, RN, BSN\*\*  
Leslie F. Atler, PhD  
Patrick J. Boyle, MD  
Mark R. Burge, MD  
Lisa Chai, RN  
Kathleen Colleran, MD  
Ateka Fondino  
Ysela Gonzales  
Doris A. Hernandez-McGinnis  
Patricia Katz, LPN  
Carolyn King, Med  
Julia Middendorf, RN  
Amer Rassam, MD  
Sofya Rubinchik, MD  
Willette Senter, RD

Debra Waters, PhD

**Albert Einstein College of Medicine (Bronx, NY)**

Jill Crandall, MD\*

Harry Shamoon, MD\*

Janet O. Brown, RN, MPH, MSN\*\*

Gilda Trandafirescu, MD\*\*

Danielle Powell, MPH

Elsie Adorno, BS

Liane Cox, MS, RD

Helena Duffy, MS, C-ANP

Samuel Engel, MD

Allison Friedler, BS

Angela Goldstein, FNP-C, NPP, CSW

Crystal J. Howard-Century, MA

Jennifer Lukin, BA

Stacey Kloiber, RN

Nadege Longchamp, LPN

Helen Martinez, RN, MSN, FNP-C

Dorothy Pompei, BA

Jonathan Scheindlin, MD

Elissa Violino, RD, MS

Elizabeth A. Walker PhD, RN

Judith Wylie-Rosett, EdD, RD

Elise Zimmerman, RD, MS

Joel Zonszein, MD

**University of Pittsburgh (Pittsburgh, PA)**

Trevor Orchard, MD\*

Elizabeth Venditti, PhD\*

Rena R. Wing, PhD\*

Susan Jeffries, RN, MSN\*\*

Gaye Koenning, MS, RD\*\*

M. Kaye Kramer, BSN, MPH\*\*

Marie Smith, RN, BSN\*\*

Susan Barr, BS

Catherine Benchoff

Miriam Boraz, PhD

Lisa Clifford, BS

Rebecca Culyba, BS

Marlene Frazier

Ryan Gilligan, BS

Stephanie Guimond, BS

Susan Harrier, MLT

Louann Harris, RN

Andrea Kriska, PhD

Qurashia Manjoo, MD

Monica Mullen, MHP, RD

Alicia Noel, BS

Amy Otto, PhD

Jessica Pettigrew, CMA

Bonny Rockette-Wagner, PhD

Debra Rubinstein, MD

Linda Semler, MS, RD

Cheryl F. Smith, PhD  
Valarie Weinzierl, MPH  
Katherine V. Williams, MD, MPH  
Tara Wilson, BA

**University of Hawaii (Honolulu, HI)**

Marjorie K. Mau, MD\*  
Narleen K. Baker-Ladao, BS\*\*  
John S. Melish, MD  
Richard F. Arakaki, MD\*  
Renee W. Latimer, BSN, MPH\*\*  
Mae K. Isonaga, RD, MPH\*\*  
Ralph Beddow, MD  
Nina E. Bermudez, MS  
Lorna Dias, AA  
Jillian Inouye, RN, PhD  
Kathy Mikami, BS, RD  
Pharis Mohideen, MD  
Sharon K. Odom, RD, MPH  
Raynette U. Perry, AA  
Robin E. Yamamoto, CDE, RD

**Southwest American Indian Centers  
(Phoenix, AZ; Shiprock, NM; Zuni, NM)**

William C. Knowler, MD, DrPH\*+  
Harelda Anderson, LMSW\*\*  
Norman Coeeyate\*\*  
Charlotte Dodge\*\*  
Mary A. Hoskin, RD, MS\*\*  
Carol A. Percy, RN, MS\*\*  
Alvera Enote\*\*  
Camille Natewa\*\*  
Kelly J. Acton, MD, MPH  
Vickie L. Andre, RN, FNP  
Rosalyn Barber  
Shandiin Begay, MPH  
Peter H. Bennett, MB, FRCP  
Mary Beth Benson, RN, BSN  
Evelyn C. Bird, RD, MPH  
Brenda A. Broussard, RD, MPH, MBA, CDE  
Brian C. Bucca, OD, FAAO  
Marcella Chavez, RN, AS  
Sherron Cook  
Jeff Curtis, MD  
Tara Dacawyma  
Matthew S. Doughty, MD  
Roberta Duncan, RD  
Cyndy Edgerton, RD  
Jacqueline M. Ghahate  
Justin Glass, MD  
Martia Glass, MD  
Dorothy Gohdes, MD  
Wendy Grant, MD  
Robert L. Hanson, MD, MPH

Ellie Horse  
Louise E. Ingraham, MS, RD, LN  
Merry Jackson  
Priscilla Jay  
Roylen S. Kaskalla  
Karen Kavena, ANP  
David Kessler, MD  
Kathleen M. Kobus, RNC-ANP  
Jonathan Krakoff, MD  
Jason Kurland, MD  
Catherine Manus, LPN  
Cherie McCabe  
Sara Michaels, MD  
Tina Morgan  
Yolanda Nashboo  
Julie A. Nelson, RD  
Steven Poirier, MD  
Evette Polczynski, MD  
Christopher Piromalli, DO  
Mike Reidy, MD  
Jeanine Roumain, MD, MPH  
Debra Rowse, MD  
Robert J. Roy  
Sandra Sangster, RD  
Janet Sewenemewa  
Miranda Smart  
Chelsea Spencer  
Darryl Tonemah, PhD  
Rachel Williams, FNP  
Charlton Wilson, MD  
Michelle Yazzie

**George Washington University Biostatistics Center (DPP Coordinating Center Rockville, MD)**

Raymond Bain, PhD\*  
Sarah Fowler, PhD\*  
Marinella Temprosa, PhD\*  
Michael D. Larsen, PhD\*  
Tina Brenneman\*\*  
Sharon L. Edelstein, ScM\*\*  
Solome Abebe, MS  
Julie Bamdad, MS  
Melanie Barkalow  
Joel Bethepu  
Tsedenia Bezabeh  
Anna Bowers  
Nicole Butler  
Jackie Callaghan  
Caitlin E. Carter  
Costas Christophi, PhD  
Gregory M. Dwyer, MPH  
Mary Foulkes, PhD  
Yuping Gao  
Robert Gooding



Adrienne Gottlieb  
Kristina L. Grimes  
Nisha Grover-Fairchild, MPH  
Lori Haffner, MS  
Heather Hoffman, PhD  
Kathleen Jablonski, PhD  
Steve Jones  
Tara L. Jones  
Richard Katz, MD  
Preethy Kolinjivadi, MS  
John M. Lachin, ScD  
Yong Ma, PhD  
Pamela Mucik  
Robert Orlosky  
Qing Pan, PhD  
Susan Reamer  
James Rochon, PhD  
Alla Sapozhnikova  
Hanna Sherif, MS  
Charlotte Stimpson  
Ashley Hogan Tjaden, MPH  
Fredricka Walker-Murray

**Lifestyle Resource Core**

Elizabeth M. Venditti, PhD\*  
Andrea M. Kriska, PhD  
Linda Semler, MS, RD, LDN  
Valerie Weinzierl, MPH

**Central Biochemistry Laboratory (Seattle, WA)**

Santica Marcovina, PhD, ScD\*  
F. Alan Aldrich\*\*  
Jessica Harting\*\*  
John Albers, PhD

Greg Strylewicz, PhD

**NIH/NIDDK (Bethesda, MD)**

R. Eastman, MD  
Judith Fradkin, MD  
Sanford Garfield, PhD  
Christine Lee, MD, MS

**Centers for Disease Control & Prevention  
(Atlanta, GA)**

Edward Gregg, PhD  
Ping Zhang, PhD

**Carotid Ultrasound**

Dan O'Leary, MD\*  
Gregory Evans

**Coronary Artery Calcification Reading Center**

Matthew Budoff, MD  
Chris Dailing

**CT Scan Reading Center**

Elizabeth Stamm, MD\*

**Dual Energy X-ray Absorptiometry Reading Center (San Francisco, CA)**

Ann Schwartz, PhD

Caroline Navy

Lisa Palermo, MS

**Epidemiological Cardiology Research Center- Epicare (Winston-Salem, NC)**

Pentti Rautaharju, MD, PhD\*

Ronald J. Prineas, MD, PhD\*\*

Teresa Alexander

Charles Campbell, MS

Sharon Hall

Yabing Li, MD

Margaret Mills

Nancy Pemberton, MS

Farida Rautaharju, PhD

Zhuming Zhang, MD

Elsayed Z. Soliman, MD\*

Julie Hu, MSc

Susan Hensley, BS

Lisa Keasler

Tonya Taylor

**Fundus Photo Reading Center (Madison, WI)**

Barbara Blodi, MD\*

Ronald Danis, MD\*

Matthew Davis, MD\*

Larry Hubbard\*

Ryan Endres\*\*

Deborah Elsas\*\*

Samantha Johnson\*\*

Dawn Myers\*\*

Nancy Barrett

Heather Baumhauer

Wendy Benz

Holly Cohn

Ellie Corkery

Kristi Dohm

Amitha Domalpally, MD, PhD

Vonnie Gama

Anne Goulding

Andy Ewen

Cynthia Hurtenbach

Daniel Lawrence

Kyle McDaniel

Jeong Pak

James Reimers

Ruth Shaw

Maria Swift

Pamela Vargo, CRA

Sheila Watson

**Neurocognitive Assessment Group**

Jose A. Luchsinger, MD, MPH

Jennifer Manly, PhD

**Nutrition Coding Center (Columbia, SC)**

Elizabeth Mayer-Davis, PhD\*

Robert R. Moran, PhD\*\*

### **Quality of Well-Being Center (La Jolla, CA)**

Ted Ganiats, MD\*  
Kristin David, MHP\*  
Andrew J. Sarkin, PhD\*  
Erik Groessl, PhD  
Naomi Katzir  
Helen Chong, MA

### **University of Michigan (Ann Arbor, MI)**

William H. Herman, MD, MPH  
Michael Brändle, MD, MS  
Morton B. Brown, PhD

### **+Genetics Working Group**

Jose C. Florez, MD, PhD<sup>1, 2</sup>  
David Altshuler, MD, PhD<sup>1, 2</sup>  
Liana K. Billings, MD<sup>1</sup>  
Ling Chen, MS<sup>1</sup>  
Maegan Harden, BS<sup>2</sup>  
Robert L. Hanson, MD, MPH<sup>3</sup>  
William C. Knowler, MD, DrPH<sup>3</sup>  
Toni I. Pollin, PhD<sup>4</sup>  
Alan R. Shuldiner, MD<sup>4</sup>  
Kathleen Jablonski, PhD<sup>5</sup>  
Paul W. Franks, PhD, MPhil, MS<sup>6, 7, 8</sup>  
Marie-France Hivert, MD<sup>9</sup>

1=Massachusetts General Hospital

2=Broad Institute

3=NIDDK

4=University of Maryland

5=Coordinating Center

6=Lund University, Sweden

7=Umeå University, Sweden

8=Harvard School of Public Health

9=Université de Sherbrooke

\* denotes Principal Investigator

\*\* denotes Program Coordinator

## **Funding**

The DPP Research Group gratefully acknowledges the commitment and dedication of the participants of the DPP and DPPOS. Research reported in this publication was supported by the National Institute of Diabetes and Digestive and Kidney Diseases (NIDDK) of the National Institutes of Health (NIH) under award numbers U01 DK048489, U01 DK048339, U01 DK048377, U01 DK048349, U01 DK048381, U01 DK048468, U01 DK048434, U01 DK048485, U01 DK048375, U01 DK048514, U01 DK048437, U01 DK048413, U01 DK048411, U01 DK048406, U01 DK048380, U01 DK048397, U01 DK048412, U01 DK048404, U01 DK048387, U01 DK048407, U01 DK048443, and U01 DK048400, by providing funding during DPP and DPPOS to the

clinical centers and the Coordinating Center for the design and conduct of the study, and collection, management, analysis, and interpretation of the data. Funding was also provided by the National Institute of Child Health and Human Development, the National Institute on Aging, the National Eye Institute, the National Heart Lung and Blood Institute, the National Cancer Institute, the Office of Research on Women's Health, the National Institute on Minority Health and Health Disparities, the Centers for Disease Control and Prevention, and the American Diabetes Association. The content is solely the responsibility of the authors and does not necessarily represent the official views of the National Institutes of Health. The Southwestern American Indian Centers were supported directly by the NIDDK, including its Intramural Research Program, and the Indian Health Service. The General Clinical Research Center Program, National Center for Research Resources, and the Department of Veterans Affairs supported data collection at many of the clinical centers. Merck KGaA provided medication for DPPOS. DPP/DPPOS have also received donated materials, equipment, or medicines for concomitant conditions from Bristol-Myers Squibb, Parke-Davis, and LifeScan Inc., Health O Meter, Hoechst Marion Roussel, Inc., Merck-Medco Managed Care, Inc., Merck and Co., Nike Sports Marketing, Slim Fast Foods Co., and Quaker Oats Co. McKesson BioServices Corp., Matthews Media Group, Inc., and the Henry M. Jackson Foundation provided support services under subcontract with the Coordinating Center. Funding was also provided by the Swedish Research Council and the European Commission (CoG-2015\_681742\_NASCENT and H2020-MSCAQ: 19 IF-2015-703787). GWAS genotyping in the DPP was supported in part by a grant from the Novo Nordisk Foundation. The sponsor of this study was represented on the Steering Committee and played a part in study design, how the study was done, and publication. All authors in the writing group had access to all data. The opinions expressed are those of the study group and do not necessarily reflect the views of the funding agencies.

## **DIETFITS**

NIDDK/NIH 1R01DK091831, Nutrition Science Initiative

## **DioGenes**

European Commission, the Food Quality and Safety Priority  
of the Sixth Framework Program (FP6-2005-513946).

## **NUGENOB**

Supported by EU grant QLK1-CT-2000-00618

## PREDIMED-Plus

**Clinical-Genetics Site: PREDIMED-Plus-Valencia (University of Valencia, University Jaume I and Health Department of Generalitat Valenciana, Valencia, Spain)** :J. I. González, J. V. Sorlí, O. Portolés, R. Fernández-Carrión, C. Ortega-Azorín, R. Barragán, E. M. Asensio, O. Coltell, C. Sáiz, I.M. Gimenez-Alba, R. Martínez-Lacruz, A. Alvarez-Sala, AC Pascual-Castelló, R. Osma, E. Ferriz, I. González-Monje, F. Giménez-Fernández, L. Quiles, P. Carrasco,, A. Carratalá-Calvo, C. Valero-Barceló, F. Antón, C. Mir, S. Sánchez-Navarro, J. Navas, I. González-Gallego, L. Bort-Llorca, L. Pérez-Ollero, M. Giner-Valero, R. Monfort-Sáez, J. Nadal-Sayol, V. Pascual-Fuster, M. Martínez-Pérez, C. Riera, M. V. Belda, A. Medina, E. Miralles, M. J. Ramírez-Esplugues, M. Rojo-Furió, G. Mattingley, M. A. Delgado, M. A. Pages, Y. Riofrío, L. Abuomar, N. Blasco-Lafarga, R. Tosca, L. Lizán, P. Guillem-Saiz, A. M. Valcarce, M. D. Medina, R. Monfort, S. de Valcárcel, N. Tormo, O. Felipe-Román, S. Lafuente, E. I. Navío, G. Aldana, J. V. Crespo, J. L. Llosa, L. González-García, R. Raga-Marí.

**Steering Committee:** D. Corella (University of Valencia, Valencia, Spain), R. Estruch (Hospital Clinic, Institute for Biomedical Research August Pi i Sunyer, Barcelona, Spain), M Fitó (Instituto Municipal de Investigación Médica, Barcelona, Spain, M. A. Martínez-González (University of Navarra, Pamplona, Spain), E. Ros (Hospital Clinic, Barcelona, Spain), J. Salas-Salvadó (University Rovira i Virgili, Reus, Spain), F. Tinahones (Virgen de la Victoria Hospital, University of Málaga, Málaga, Spain).

Funding and support: The PREDIMED-Plus is supported by the Spanish Government Official Agency for funding biomedical research - Instituto de Salud Carlos III (ISCIII), with competitive grants for the periods 2014–16, 2015–17, 2017–19, 2018–20, through the Fondo de Investigación para la Salud (FIS), which is co-funded by the European Regional Development Fund (grants: PI13/00673, PI13/00492, PI13/00272, PI13/01123, PI13/00462, PI13/00233, PI13/02184, PI13/00728, PI13/01090, PI13/01056, PI14/01722, PI14/00636, PI14/00618, PI14/00696, PI14/01206, PI14/01919, PI14/00853, PI14/01374, PI16/00473, PI16/00662, PI16/01873, PI16/01094, PI16/00501, PI16/00533, PI16/00381, PI16/00366, PI16/01522, PI16/01120, PI17/00764, PI17/01183, PI17/00855, PI17/01347, PI17/00525, PI17/01827, PI17/00532, PI17/00215, PI17/01441, PI17/00508, PI17/01732, PI17/00926). The PREDIMED-Plus has been supported by the European Research Council (Advanced Research Grant 2014–2019; agreement #340918 granted to MAM-G). Additionally, the PREDIMED-Plus-Valencia Study has been supported by: a grant from the centro de investigación biomédica en red (CIBER), fisiopatología de la obesidad y Nutrición (CIBEROBN-06-03-0035) , the Spanish Ministry of Health (Instituto de Salud Carlos III) and the Ministerio de Economía y competitividad and the Ministerio de innovación y ciencia (, PI06/1326, PI13/00728, PI16/00366, PI19/00781, SAF2016-80532-R and FPU 18/01703); the University Jaume I (grants P1-1B2013-54 and

COGRUP/2016/06); the Rei Jaume I Award for Medical Research 2018; the Fundació La Marató de TV3 (grant 538/U/2016); the Fundación Ignacio Larramendi (Mapfre), and the Generalitat Valenciana-Conselleria de Innovación, Universidades, Ciencia y Sociedad Digital (grants PROMETEO2017/017, AEST/2018/044, APOSTD/2019/136 and APOSTD20/164). Fundación Patrimonio Comunal Olivarero is providing the necessary amounts of olive oil. Nuts were initially and only partially provided by the Pistachios Growers and Almond Board of California, but most from the funding. None of these funding sources plays any role in the design, collection, analysis or interpretation of the data or in the decision to submit manuscripts for publication.
